# Supplementary material for: In situ synthesis of NIR-light emitting carbon dots derived from spinach for bio-imaging applications
Source: Royal Society of Chemistry journal article supplement (doi:10.1039/c7tb00634a), 2017-01-01
Supplement: c7tb00634a1.pdf [file c7tb00634a1.pdf]

## Electronic Supplementary Information (ESI)

### **In situ synthesis of NIR-Light emission carbon dots derived from spinach for bio-imaging application**

Liping Li,<sup>a,b,c,1</sup> Ruiping Zhang,<sup>d,1</sup> Chunxiang Lu,<sup>\*a</sup> Jinghua Sun,<sup>e</sup> Lingjie Wang,<sup>e</sup> Botao Qu,<sup>e</sup> Tingting Li,<sup>e</sup> Yaodong Liu <sup>\*a</sup> and Sijin Li <sup>\*f</sup>

<sup>a</sup> National Engineering Laboratory for Carbon Fiber Technology, Institute of Coal Chemistry, Chinese Academy of Sciences, Taiyuan 030001, P. R. China.

<sup>b</sup> University of Chinese Academy of Sciences, Beijing 100049, P. R. China.

<sup>c</sup> Key Laboratory of Carbon Materials, Institute of Coal Chemistry, Chinese Academy of Sciences, Taiyuan 030001, P. R. China.

<sup>d</sup> Imaging Department of Shanxi Provincial Cancer Hospital, Imaging Department of Affiliated Tumor Hospital of Shanxi Medical University; Shanxi Key Scientific and Technological Innovation Platform for Precision Diagnosis and Treatment of Head and Neck Cancer, The First Hospital of Shanxi medical University, Taiyuan 030013, P. R. China

<sup>e</sup> Shanxi Medical University, Taiyuan 030001, P. R. China.

<sup>f</sup> Nuclear Medicine Department of The First Hospital of Shanxi medical University, Taiyuan 030001, P. R. China. E-mail: 769272365@qq.com

<sup>1</sup> *These authors are first authors with equal contribution.*

### Synthesis of CDs-180 and CDs-120:

The CDs-180 and CDs-120 were prepared at 180 °C and 120 °C, and the other conditions and procedure for the preparation of CDs-180 and CDs-120 were the same as those for R-CDs.

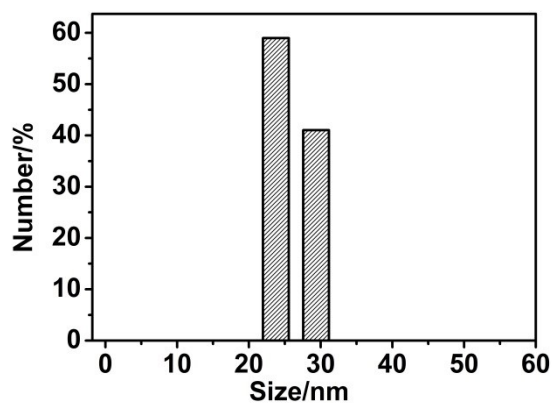

Figure S1. The DLS analysis of the R-CDs

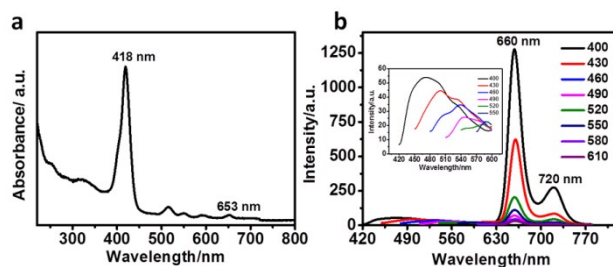

Figure S2. (a) UV-visible absorption and (b) PL emission spectra of the TP-CDs under different excitation wavelengths. (Insert is the PL emission of the TP-CDs from 420-600 nm).

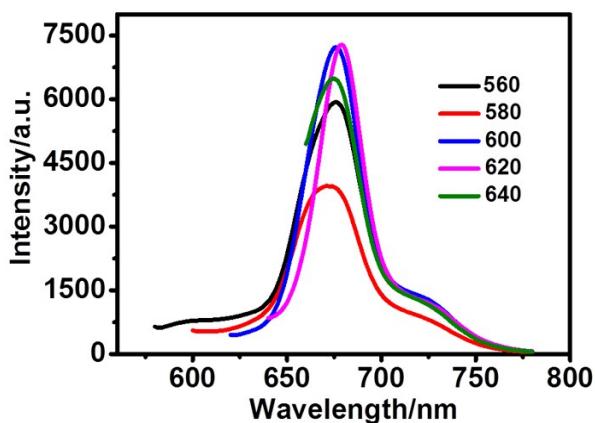

Figure S3. The PL emission of R-CDs at 600-800 nm under different excitation wavelengths

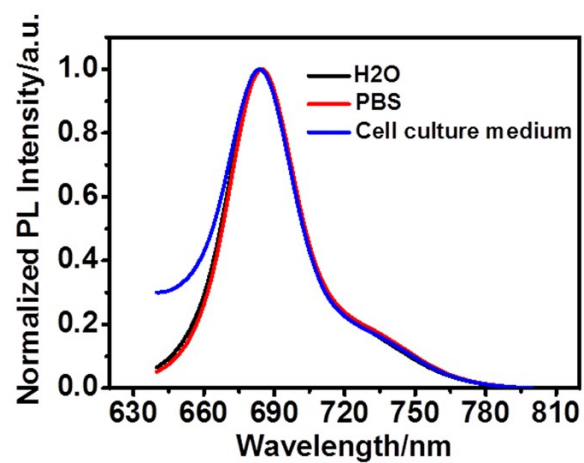

**Figure S4.** Fluorescence emission spectra of the R-CDs (20 ppm) in water, PBS, and McCoy's 5A (modified) media.

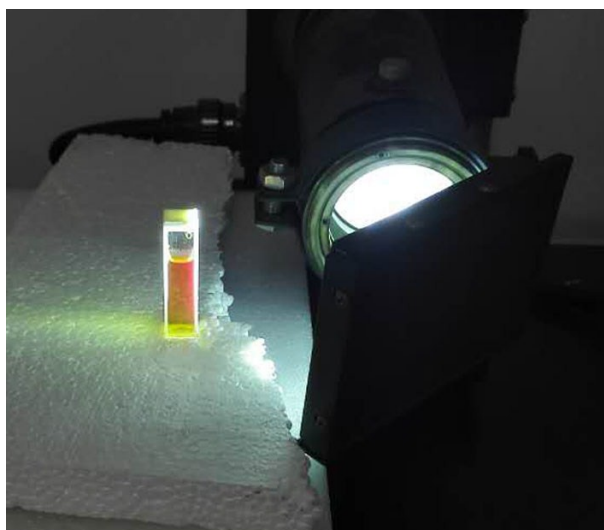

**Figure S5.** The optical photograph of the R-CDs under continuous irradiation of a mercury lamp (350 W).

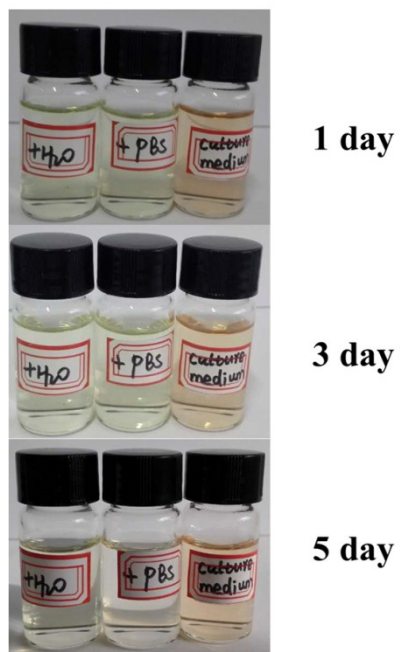

**Figure S6.** The dispersed stability of R-CDs in water, PBS, and cell culture medium.

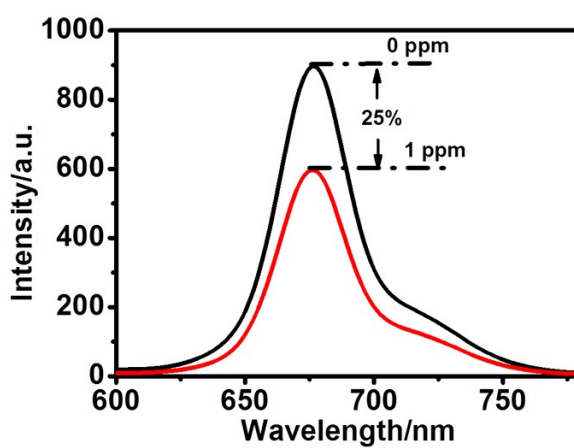

**Figure S7.** Fluorescence response of the R-CDs in the absence and presence of Cu<sup>2+</sup> with a concentration of 1 ppm under the 580 nm excitation wavelength.

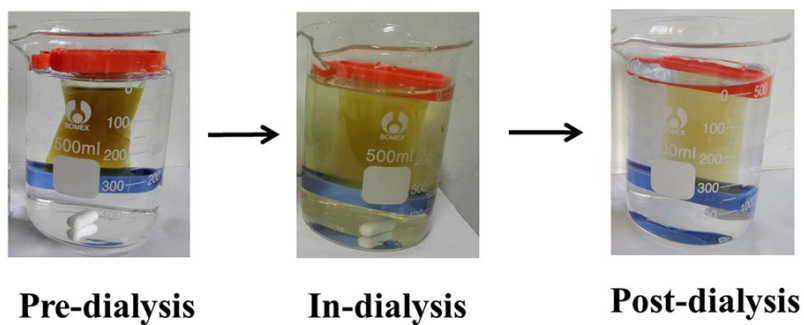

**Figure S8.** Dialysis process of the R-CDs.

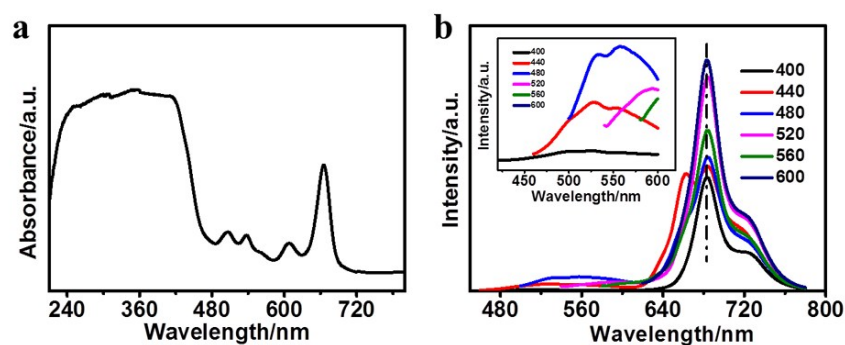

**Figure S9.** (a) UV-visible absorption and (b) PL emission spectra of the untreated spinach extraction.

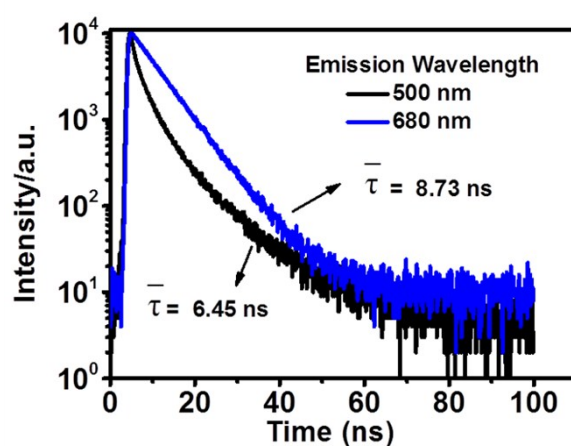

**Figure S10.** Time-resolved PL decay curves of R-CDs at 500 and 680 nm under 440 nm excitation

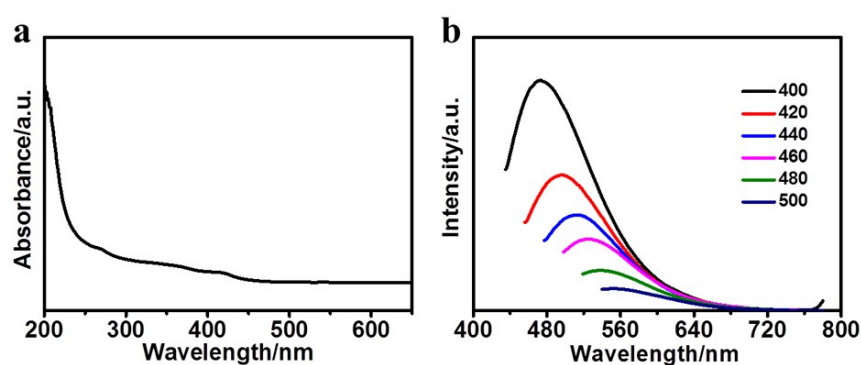

**Figure S11.** (a) UV-visible absorption and (b) PL emission spectra of the CDs-180.

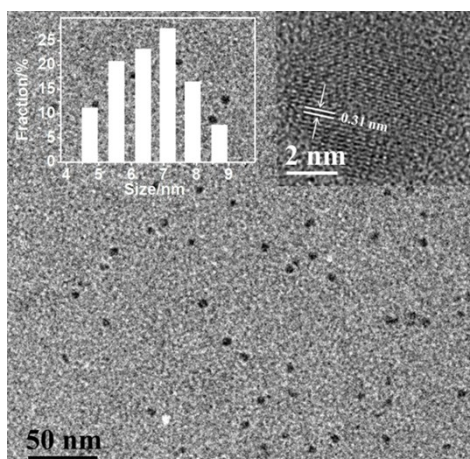

**Figure S12** The TEM image of the CDs-180. Insert: the size distribution (left) and HRTEM images (right) of the CDs-180.

Table S1. Representative examples of red emission carbon dots from different precursors and their optical properties.

| Starting materials                                                 | Emission peak (nm) | QY(%) | Refs. |
|--------------------------------------------------------------------|--------------------|-------|-------|
| Graphite/K <sub>2</sub> S <sub>2</sub> O <sub>8</sub>              | 610                | n.d.  | 1     |
| p-phenylenedimine                                                  | 603                | 26.1  | 2     |
| Urea and p-phenylenedimine                                         | 625                | 24    | 3     |
| Grapheme oxide/ H <sub>2</sub> O <sub>2</sub> / NH <sub>4</sub> OH | 630                | 1     | 4     |
| Polythiophene phenylpropionic acid                                 | 640                | n.d.  | 5     |

n.d.=not determined

Table S2. QY of R-CDs under excitation at 420 nm.

| Sample | Solvent | $\lambda_{\text{ex}}/\text{nm}$ | $\Phi_1/\%$ | $\Phi_2/\%$ | $\Phi_3/\%$ | $\Phi_4/\%$ | $\Phi_5/\%$ | $\Phi_{\text{ave}}/\%$ | $\Phi_{\text{corr}}/\%$ |
|--------|---------|---------------------------------|-------------|-------------|-------------|-------------|-------------|------------------------|-------------------------|
| Rh-6G  | Ethanol | 488                             | 79.89       | 82.68       | 80.02       | 81.89       | 80.03       | 80.90                  | 95                      |
| R-CDs  | Ethanol | 420                             | 12.49       | 14.33       | 15.74       | 14.08       | 12.81       | 13.06                  | 15.34                   |

Table S3. QY of CDs-120 under excitation at 420 nm.

| Sample | Solvent | $\lambda_{\text{ex}}/\text{nm}$ | $\Phi_1/\%$ | $\Phi_2/\%$ | $\Phi_3/\%$ | $\Phi_4/\%$ | $\Phi_5/\%$ | $\Phi_{\text{ave}}/\%$ | $\Phi_{\text{corr}}/\%$ |
|--------|---------|---------------------------------|-------------|-------------|-------------|-------------|-------------|------------------------|-------------------------|
| Rh-6G  | Ethanol | 488                             | 79.89       | 82.68       | 80.02       | 81.89       | 80.03       | 80.90                  | 95                      |
| R-CDs  | Ethanol | 420                             | 12.94       | 13.89       | 12.26       | 12.19       | 14.03       | 13.89                  | 16.31                   |

## Reference:

1. T. Xiaoyun, L. Yunchao, L. Xiaohong, Z. Shixin, F. Louzhen and Y. Shihe, *Chem. Commun.*, 2015, **51**, 2544-2546.
2. K. Jiang, S. Sun, L. Zhang, Y. Lu, A. G. Wu, C. Z. Cai and H. W. Lin, *Angew. Chem. Int. Edit.*, 2015, **54**, 5360-5363.
3. H. Ding, S. B. Yu, J. S. Wei and H. M. Xiong, *ACS Nano*, 2016, **10**, 484-491.
4. C. C. Ke, Y. C. Yang and W. L. Tseng, *Part. Part. Syst. Char.*, 2016, **33**, 132-139.
5. J. Ge, Q. Jia, W. Liu, L. Guo, Q. Liu, M. Lan, H. Zhang, X. Meng and P. Wang, *Adv. Mater.*, 2015, **27**, 4169-4177.
